# Supplementary material
Source: MDPI journal article supplement (https://www.mdpi.com/2072-4292/15/4/971)
Supplement: s1 [file s1]

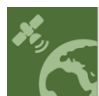

**Table S1.** AVIRIS-ng flightlines used for this analysis. Both short name (this analysis) and full flightline ID (archived on the JPL database) are provided. 15 lines total.

| Short Name   | Flightline ID      |
|--------------|--------------------|
| Gilroy       | ang20200918t232303 |
| Kern_1       | ang20200724t191126 |
| Kern_2       | ang20200924t213537 |
| Kings        | ang20200924t200728 |
| Lodi_1       | ang20200907t203701 |
| Lodi_2       | ang20200918t210935 |
| MaderaFresno | ang20200924t203044 |
| Napa_1       | ang20200918t215728 |
| Napa_2       | ang20200918t220357 |
| Napa_3       | ang20200918t221604 |
| Solano       | ang20200918t204940 |
| Tulare_1     | ang20200903t201645 |
| Tulare_2     | ang20200903t203648 |
| TulareKings  | ang20200924t193402 |
| Yolo         | ang20200918t203620 |

**Table S2.** Mutual information matrix. Higher mutual information implies a stronger relationship. Bootstrapping by random selection of 30% of data values resulted in MI variability on the order of 0.01 or less.

***Mutual Information (MI)***

|             | <b>Fv</b> | <b>DVI</b> | <b>NDVI</b> | <b>NIRv</b> | <b>SR</b> | <b>EVI</b> | <b>EVI2</b> |
|-------------|-----------|------------|-------------|-------------|-----------|------------|-------------|
| <b>Fv</b>   | 12.01     | 1.44       | 0.69        | 1.41        | 0.69      | 1.25       | 1.34        |
| <b>DVI</b>  | 1.44      | 12.01      | 0.77        | 2.45        | 0.77      | 1.60       | 1.80        |
| <b>NDVI</b> | 0.69      | 0.77       | 12.01       | 0.98        | 11.34     | 1.20       | 1.25        |
| <b>NIRv</b> | 1.41      | 2.45       | 0.98        | 12.01       | 0.98      | 2.01       | 2.77        |
| <b>SR</b>   | 0.69      | 0.77       | 11.33       | 0.98        | 12.01     | 1.20       | 1.25        |
| <b>EVI</b>  | 1.25      | 1.60       | 1.20        | 2.01        | 1.20      | 12.01      | 2.30        |
| <b>EVI2</b> | 1.34      | 1.80       | 1.25        | 2.77        | 1.25      | 2.30       | 12.01       |

**Table S3.** Correlation matrix. All Pearson correlation coefficients are significantly different from the uncorrelated null hypothesis ( $p < 0.01$ ).

***Pearson Correlation ( $\rho$ )***

|             | <b>Fv</b> | <b>DVI</b> | <b>NDVI</b> | <b>NIRv</b> | <b>SR</b> | <b>EVI</b> | <b>EVI2</b> |
|-------------|-----------|------------|-------------|-------------|-----------|------------|-------------|
| <b>Fv</b>   | 1.000     | 0.950      | 0.837       | 0.949       | 0.806     | 0.940      | 0.949       |
| <b>DVI</b>  | 0.950     | 1.000      | 0.826       | 0.992       | 0.818     | 0.973      | 0.982       |
| <b>NDVI</b> | 0.837     | 0.826      | 1.000       | 0.860       | 0.913     | 0.904      | 0.910       |
| <b>NIRv</b> | 0.949     | 0.992      | 0.860       | 1.000       | 0.873     | 0.986      | 0.990       |
| <b>SR</b>   | 0.806     | 0.818      | 0.913       | 0.873       | 1.000     | 0.886      | 0.882       |
| <b>EVI</b>  | 0.940     | 0.973      | 0.904       | 0.986       | 0.886     | 1.000      | 0.993       |
| <b>EVI2</b> | 0.949     | 0.982      | 0.910       | 0.990       | 0.882     | 0.993      | 1.000       |

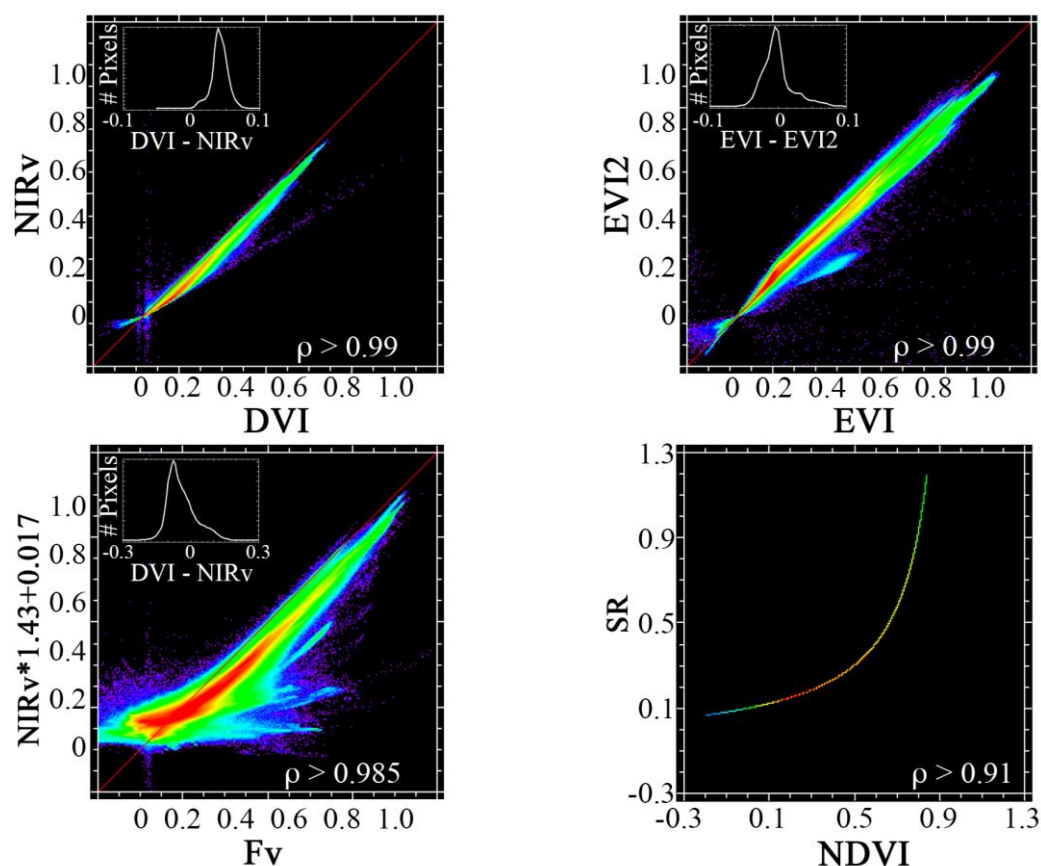

**Figure S1. Additional VI relationships.** Upper left: DVI and NIRv are highly correlated ( $\rho > 0.99$ ), but DVI gives slightly higher values (mean difference 4.0%, standard deviation 1.2%). Upper right: EVI and EVI2 are also highly correlated ( $\rho > 0.99$ ), with a much smaller average difference (mean = 0.1%) but greater dispersion (standard deviation = 2.2%). Lower left: Regressing NIRv against Fv greatly reduces underestimation but increases the sensitivity to substrate background reflectance (note negative values excluded in regression). Lower right: The bivariate distribution of NDVI and SR gives a strikingly tight curvilinear relationship. An algebraic explanation for this is explored in Analytical Exercise S1.

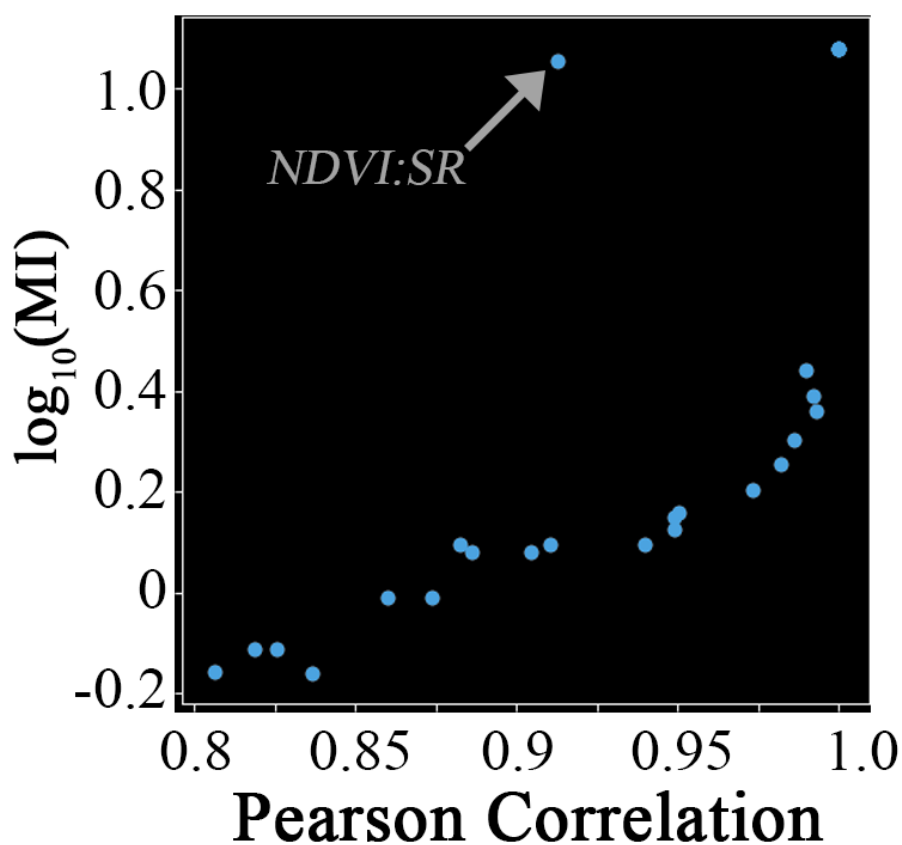

**Figure S2. Parametric versus nonparametric statistics.** Pearson correlation coefficient ( $\rho$ ) is roughly loglinear with Mutual Information (MI) for these distributions. The strong nonlinear analytic NDVI:SR relationship (lower right on Figure S1) occurs as an outlier deviating well above the log-linear relation ( $\rho = 0.91$ ,  $\log_{10}(\text{MI}) > 1$ ). This demonstrates the efficacy of MI in quantifying nonlinear relationships. The lack of similarly elevated MI values for NDVI: $F_v$  and SR: $F_v$  provides further evidence that the greater dispersion and heteroskedasticity of these indexes would be challenging to incorporate effectively into even a nonlinear regression. The 7 identical outliers ( $\rho = 1.0$ ,  $\text{MI} = 12.01$ ) upper right correspond to self-information of each distribution with itself.

**Analytical Exercise S1.** An exploration of the relationship between SR and NDVI.

Begin with the formula for SR:

$$SR = \frac{NIR}{Red}$$

Rearrange terms:

$$Red = \frac{NIR}{SR}$$

Now examine the formula for NDVI:

$$NDVI = \frac{NIR - Red}{NIR + Red}$$

Substitute for Red:

$$NDVI = \frac{NIR - \frac{NIR}{SR}}{NIR + \frac{NIR}{SR}}$$

Multiply by 1:

$$NDVI = \frac{NIR - \frac{NIR}{SR}}{NIR + \frac{NIR}{SR}} \times \frac{SR}{SR}$$

$$NDVI = \frac{(SR \times NIR) - NIR}{(SR \times NIR) + NIR}$$

Factor:

$$NDVI = \frac{NIR \times (SR - 1)}{NIR \times (SR + 1)}$$

Simplify:

$$NDVI = \frac{SR - 1}{SR + 1}$$

The relationship between SR and NDVI can thus be described by a simple rational function of the form:

$$y = \frac{x - 1}{x + 1}$$

This explains the curvilinear shape of the lower right plot in Figure S1, as well as the notably elevated MI score for this pair of vegetation indices.
